# Supplementary material
Source: publisher figshare collection journal article supplement (https://acs.figshare.com/ndownloader/files/4036474)

## Supplementary Information

### **Aromatic S-Heterocycle and Fluorene Derivatives as Solution-Processed Blue Fluorescent Emitters: Structure-Property Relationships for Different Sulfur Oxidation States**

*Liang Yao, Shuheng Sun, Shanfeng Xue, Shitong Zhang, Xiaoyan Wu, Huanhuan Zhang, Yuyu Pan, Cheng Gu, Fenghong Li and Yuguang Ma\**

*[\*] Prof. Y. G. Ma, L. Yao, S. H. Sun, Dr. S. H. Xue, S. T. Zhang, X. Y. Wu, H. H. Zhang, Y. Y. Pan, Dr. C. Gu, Prof. F. H. Li  
State Key Lab of Supramolecular Structure and Materials, Jilin University,  
2699 Qianjin Avenue, Changchun, 130012, P. R. China  
E-mail: ygma@jlu.edu.cn*

## Table of Contents

|                                                                                                                                                                                                   |   |
|---------------------------------------------------------------------------------------------------------------------------------------------------------------------------------------------------|---|
| S1. The synthesis and purification procedures for M2 and M4.....                                                                                                                                  | 1 |
| S2. Top views of DFT-optimized geometries of DBT and DBTSO: Table S1.....                                                                                                                         | 1 |
| S3. Absorption and photoluminescence spectra of a) D1 and D2, b) P1 and P2 in THF solutions.....                                                                                                  | 2 |
| S4. The PL spectrum of thin films annealed at 100 °C for 3 h in air.....                                                                                                                          | 3 |
| S5. The emission peaks in different solvents: Table S2.....                                                                                                                                       | 3 |
| S6. AFM topographic images of small molecule films on ITO/PEDOT:PSS surface.....                                                                                                                  | 4 |
| S7. AFM topographic images of small molecule films after annealing at 60 °C for 20 min on ITO/PEDOT:PSS surface.....                                                                              | 4 |
| S8. The luminance-current density-voltage characteristics of the devices.....                                                                                                                     | 4 |
| S9. The EL spectra of P2 device under the different currents.....                                                                                                                                 | 5 |
| S10. (a) The EQE-current density characteristics of the device with the emissive layer of PVK: PBD: P2 (60%: 30%: 10%); (b) The EL spectra of the doping device under the different currents..... | 5 |

## S1. The synthesis and purification procedures for M2 and M4

*3,7-dibromo-dibenzothiophene (M2)* 3,7-Dibromodibenzo-thiophene dioxide (M1) (448 mg, 1.2 mmol) was suspended in dry diethyl ether (10 mL). Lithium aluminium hydride (227 mg, 6.0 mmol) was added slowly at room temperature to maintain a moderate reflux. When the addition was complete, the mixture was stirred and refluxed for an additional 2 h. Water was added very carefully to destroy excess LiAlH<sub>4</sub> and then concentrated hydrochloric acid (10 mL) was added. Diethyl ether was removed by evaporation and the resulting mixture was filtered to obtain a colorless solid. Crystallisation of the solid from chloroform afforded 254 mg (62%) of M2 as colorless needles. <sup>1</sup>H NMR (500 MHz, CDCl<sub>3</sub>, δ): 8.01 (s, 2H), 7.99 (d, *J* = 8.4 Hz, 2H), 7.60 (d, *J* = 8.4 Hz, 2H); MALDI-TOF MS (mass *m/z*): 341.6 [*M*<sup>+</sup>].

*3,7-dibromo-10-n-hexylphenothiazine-S,S-dioxide (M4)* To a solution of 3,7-dibromo-10-hexyl-phenothiazine (M3) (1.5 g, 3.4 mmol) in dichloromethane (100 mL) stirred at 0 °C was added an excess of 3-chloroperoxybenzoic acid (5 g, 28.9 mmol). After stirring for 4 h, the reaction mixture was quenched with a 2 M K<sub>2</sub>CO<sub>3</sub> solution and extracted with dichloromethane. The combined organic layer was dried with anhydrous Na<sub>2</sub>SO<sub>4</sub> and evaporated to dryness. The crude product was purified by silica gel column chromatography with 1:30 (ethyl acetate/hexane) as an eluent; this afforded 1.2 g (74%) of the product as a pale yellow solid. <sup>1</sup>H NMR (500 MHz, CDCl<sub>3</sub>, δ): 8.22 (s, 2H), 7.73 (d, *J* = 9.1 Hz, 2H), 7.24 (d, *J* = 9.1 Hz, 2H), 4.13 (m, 2H), 1.89 (m, 2H), 1.46 (m, 2H), 1.37 (m, 4H), 0.93 (t, *J* = 6.9 Hz, 3H; CH<sub>3</sub>); MALDI-TOF MS (mass *m/z*): 441.1 [*M*<sup>+</sup>].

## S2. Top views of DFT-optimized geometries of DBT and DBTSO

| Compound                                                                            | Ground state                                                                        | Excited state                                                                        |
|-------------------------------------------------------------------------------------|-------------------------------------------------------------------------------------|--------------------------------------------------------------------------------------|
| 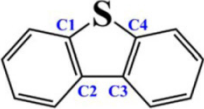 |  |  |
|  |  |  |

Table S1. Selected bond distance (Å) and angle (°).

| Bonds    | DBT  | DBTSO |
|----------|------|-------|
| S1-C1    | 1.77 | 1.80  |
| C1-C2    | 1.41 | 1.40  |
| C2-C3    | 1.45 | 1.48  |
| C1-S1-C4 | 91.0 | 91.6  |

S3. Absorption and photoluminescence spectra of a) D1 and D2, b) P1 and P2 in THF solutions.

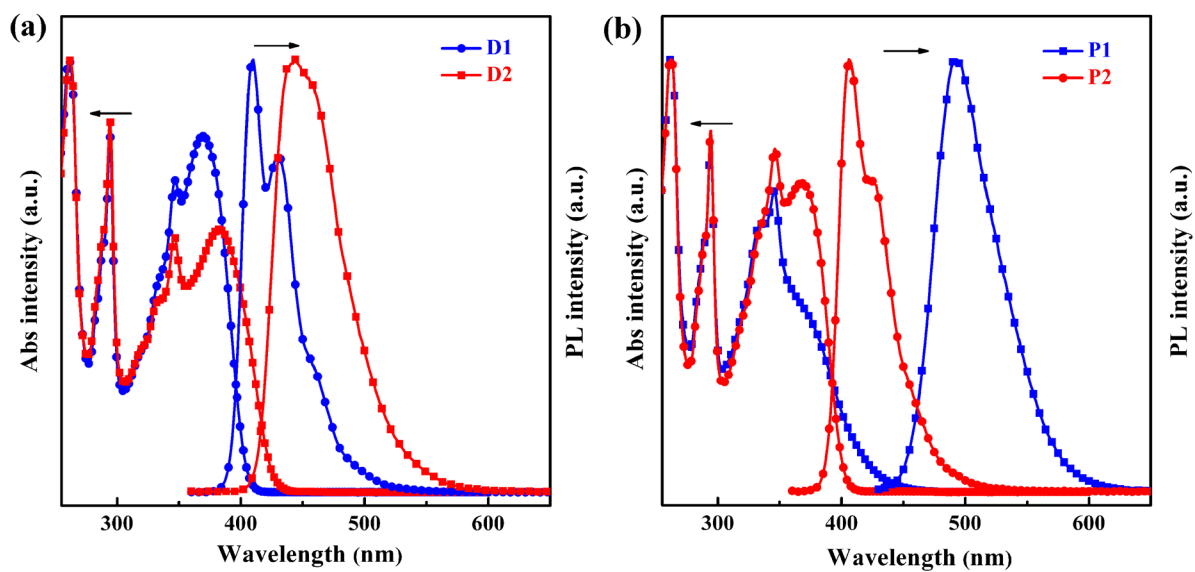

**S4. The PL spectrum of thin films annealed at 100 °C for 3 h in air.**

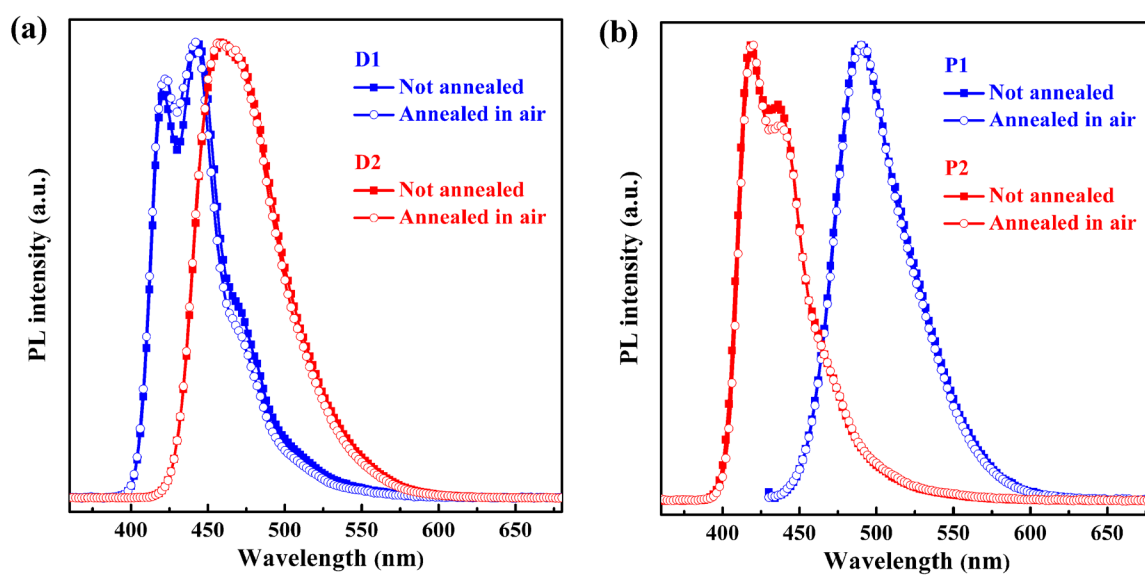

**S5. The emission peaks in different solvents**

Table S2. The emission peaks in different solvents.

| Solvent | DMF    | CHCl <sub>3</sub> | THF    | Tolene |
|---------|--------|-------------------|--------|--------|
| D1      | 413 nm | 409 nm            | 410 nm | 407 nm |
| D2      | 471 nm | 449 nm            | 444 nm | 430 nm |
| P1      | 505 nm | 489 nm            | 493 nm | 487 nm |
| P2      | 411 nm | 405 nm            | 406 nm | 406 nm |

**S6. AFM topographic images of small molecule films on ITO/PEDOT:PSS surface**

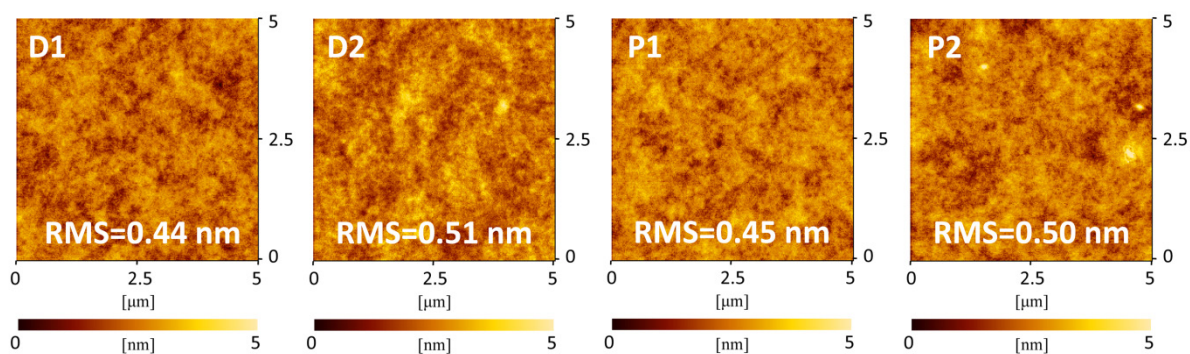

**S7. AFM topographic images of small molecule films after annealing at 60 °C for 20 min on ITO/PEDOT:PSS surface**

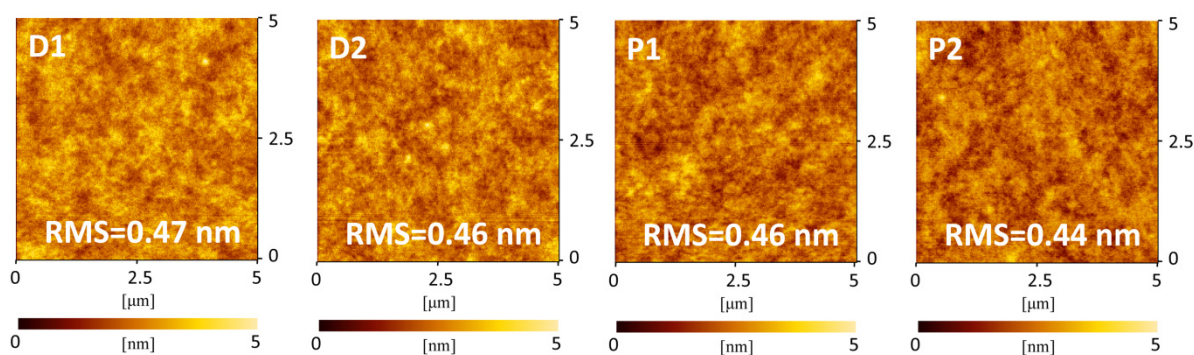

**S8. The luminance-current density-voltage characteristics of the devices based on (a) D1 and D2, (b) P1 and P2 with the configuration of ITO/PEDOT:PSS (40 nm)/emitters (80 nm)/CsF (1.5 nm)/Al (120 nm)**

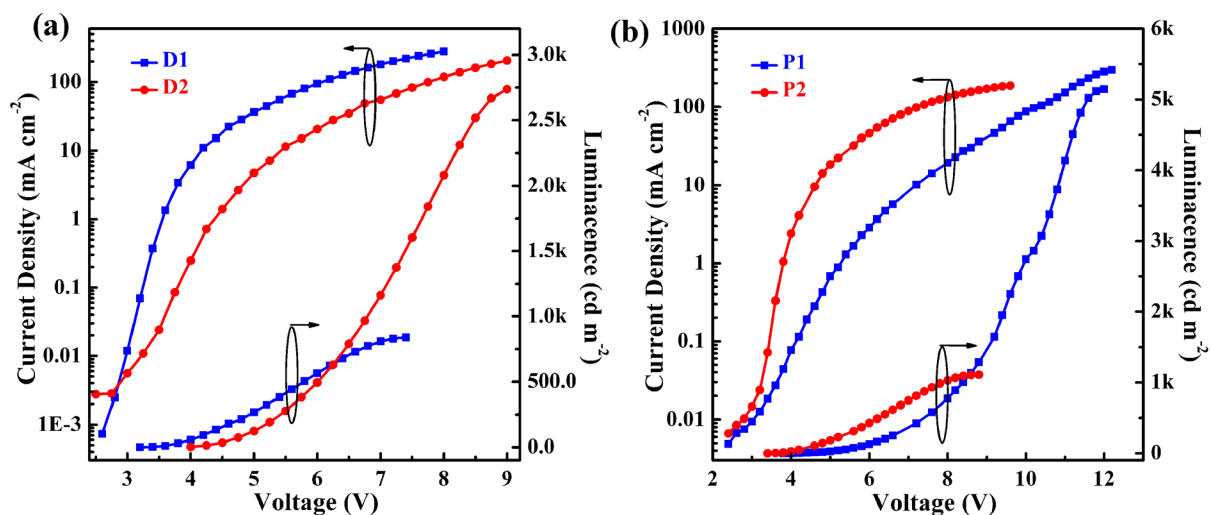

S9. The EL spectra of P2 device under the different currents.

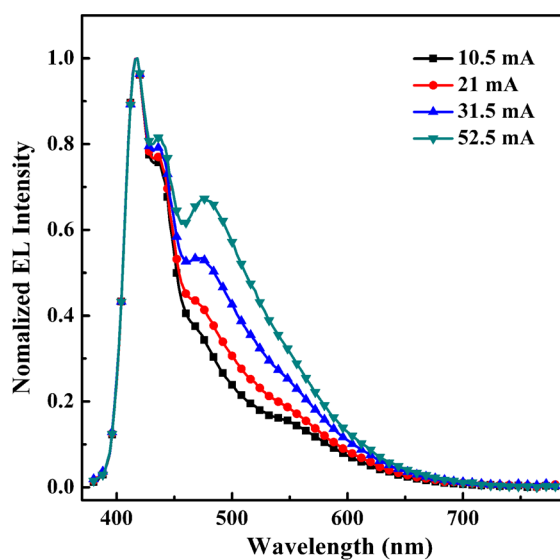

S10. (a) The EQE-current density characteristics of the device with the emissive layer of PVK: PBD: P2 (60%: 30%: 10%); (b) The EL spectra of the doped device under the different currents.

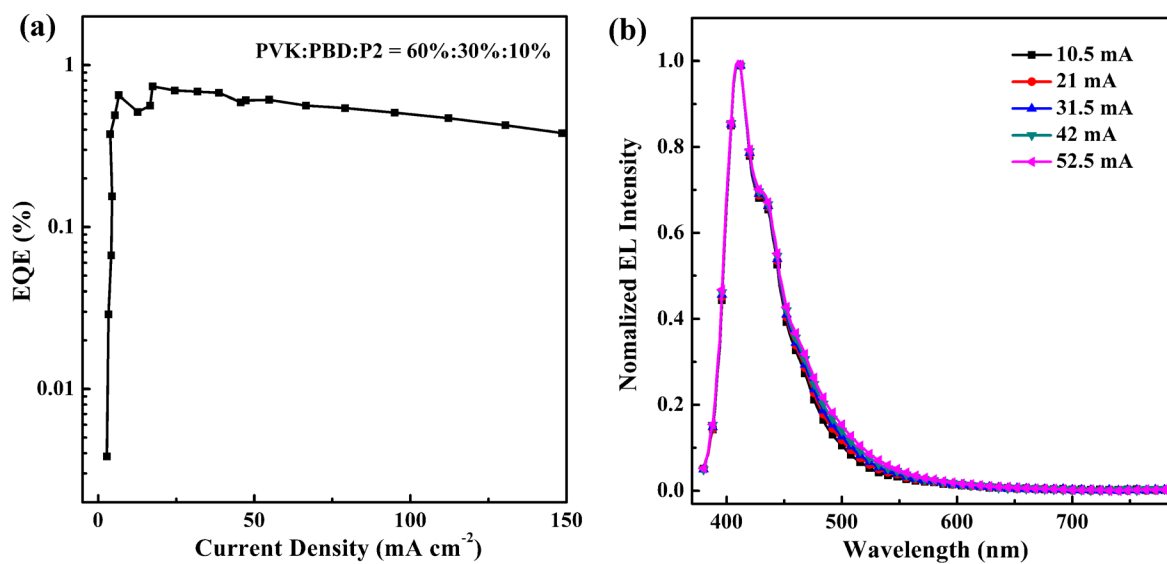

Supplement: Supplementary file 1 [file 4036474]
